1 ***In vitro* selection of a microbial consortium predictive of synergistic functioning along multiple ecosystem scales**

2

3 Peter Baas\*<sup>1</sup>, Colin Bell<sup>2</sup>, Lauren Mancini<sup>1</sup>, Melanie Lee<sup>1</sup>, Matthew D. Wallenstein<sup>3</sup>, Richard T. Conant<sup>1</sup>

4

5 <sup>1</sup>Colorado State University, Natural Resource Ecology Laboratory, Fort Collins, CO, USA

6 <sup>2</sup>Growcentia Inc., 500 E Vine Dr, Fort Collins, CO, USA

7 <sup>3</sup>Colorado State University, Soil and Crop Sciences, Fort Collins, CO, USA

8 \*Corresponding author: [peter.baas@colostate.edu](mailto:peter.baas@colostate.edu)

9

10

11

12

## 13 Abstract

14 Soil microbes form complex interactive networks throughout the soil and plant rhizosphere. These interactions can result in emergent properties  
15 for consortia that are not predictable from the phenotypes of constituents in isolation. We used a four-species consortium to assess the capacity of  
16 individual microbial species versus different consortia permutations of the four species to contribute to increased P-solubilization using soil  
17 incubations and plant growth experiments. We found that as different combinations of bacterial species were assembled into differing consortia,  
18 they demonstrated differing abilities to stimulate soil P cycling and plant growth. The combination of all four microbes in the consortia were much  
19 more effective at solubilizing P and stimulating plant growth than any of the individual bacterial species alone. This suggests that *in vivo*  
20 functionally synergistic soil microbial consortia can be adept at performing specific ecosystem functions *in situ*. Improving our understanding of  
21 the mechanisms that facilitate synergistic functioning examined in this study is important for maximizing future food production and  
22 agroecosystem sustainability.

23

## 24 **Introduction**

25 Microbial inoculants are increasingly promoted and adopted to enhance crop productivity, soil health, and overall nutrient use efficiency [1].

26 Given the key role of the phytobiome for soil ecosystem functioning and plant health, microbiome enhancement and engineering seems like a

27 logical intervention in crop production systems. Yet, many challenges lie between microbial discovery in the laboratory and successful

28 implementation in the field [2]. The functional attributes of isolated bacteria and fungi can be routinely assayed in the laboratory. Microbial

29 genomics identifies the potential for specific functions and traits, and can be predictive of phenotype. For some conserved traits, microbial

30 phylogeny alone predicts function [3]. However, the expressed phenotypes of individual isolates often vary with environmental conditions,

31 including pH, nutrient availability, and in response to stress [4]. As a result, single isolates that show promise in the laboratory often prove

32 ineffective when inoculated into field soils [5, 6].

33

34 Predictions of *in situ* functioning of isolates are further challenged by the strong effects of interactions among microbial taxa. Deep learning

35 approaches applied to constructed synthetic communities have revealed causality between microbiome composition and host phenotypes in

36 complex systems under nutrient limited or stressed conditions [7]. Herrera Paredes, Gao (7) showed how different synthetic microbial consortia

37 can affect plant gene expression associated with phosphorus starvation. They suggested that the microbe-microbe interactions were likely

38 responsible for microbial community assembly, which, in turn, allowed for emergent interactions with the host plant to occur. This recent work

39 suggests a framework explaining why broadly efficacious microbial inoculants based on isolates are rare and often provide only a limited solution

40 for improving plant productivity and agronomic efficiency in real-world agriculture applications [8].

41 Functional microbial consortia may be robust alternatives to single isolates for use as beneficial inoculants in agricultural systems. We define a

42 true functional consortium as two or more taxa that demonstrate enhanced function when interacting relative to any individual constituent alone.

43 Many studies have examined the effects of combinations of microbes on crop yield and other outcomes, often compared to single isolates.

44 However, we are not aware of previous studies that have mechanistically attributed consortium effects to synergy among microbial constituents.

45

46 The objective of the current study was to assess how the components of a microbial consortium (made up of four bacterial species) contributed to

47 increased P – cycling functionality using *in situ* soil incubation and subsequent plant growth experiments to measure the capacity of individual

48 microbial species along with different permutations/combinations of the representative mixed bacterial species. We hypothesized that a bacterial

49 consortium co-selected for its ability to mobilize P would outperform any single constituent alone. In order to elucidate P-mobilizing synergies

50 among microbial taxa, we studied a four-species bacterial consortia in a commercially available product, MAMMOTH P® [9]. MAMMOTH P® is

51 an organic liquid microbial soil additive that enhances soil P mobilization and plant yield across many crops [10, 11]. This patented technology

52 was developed using a community-level directed selection approach to optimize consortia interactions resulting in phosphorus solubilization.

53 Using this technology, we conducted a series of experiments to compare the performance of individual bacterial species to all consortia

54 combinations. We tested the combinations at three levels of complexity: (1) liquid culture media, (2) soils, and (3) plant-soil mesocosms. We

55 predicted that P-mobilization and plant yield would increase as the number of constituent bacterial species in the functionally selected consortia

56 increased.

57

## 58 **Materials and Methods**

59

### 60 **Microbial Culturing**

61 We used a consortium known to mobilize phosphorus (Mammoth P, Growcentia Inc., Fort Collins, CO, USA). Isolate cultures were grown  
62 in Criterion™ Nutrient Broth (Hardy Diagnostics Inc., Santa Maria, CA, USA) from a glycerol stock stored at -80°C. Plant extract (2% (w/w)  
63 alfalfa extract)) was inoculated with 5% of culture from glycerol stock and allowed to grow for 2.5 days at 25°C which resulted in cell colony  
64 forming units (CFU) >10<sup>9</sup>. Next, the isolate cultures were recombined in previously determined relative proportions (Baas, Bell (10); **Table 1&2**),  
65 by adding 200 µL to 800 µL of proprietary restrictive media [9] low in available phosphorus and high in insoluble forms of inorganic P (i.e. FePO<sub>4</sub>  
66 and AlPO<sub>4</sub>). Ortho-P was determined after 1 and 3 h using the ascorbic acid colorimetric method [12] adapted for microtiter plate measurements  
67 on a Tecan plate reader. P-mobilization was calculated by dividing the increase in the concentration of ortho-P (nM) by the time incubated (hours).  
68

### 69 **Soil Inoculation Trials**

70 Isolates were cultured from a seed bank as described in the previous section. Soil slurries (80g air-dried soil with 400 mL DI water) were  
71 prepared from soil sterilized by autoclaving. We used soils collected from the top five cm from three different agricultural systems in Colorado: 1)  
72 Agricultural Research Development and Education Center (ARDEC) in Fort Collins, CO, USA; 2) Irrigated corn site at the USDA Central Plains  
73 Resources Management Research Station in Akron, CO, USA y (40.15° N 103.15° W) and 3) dryland corn site at the USDA Central Plains  
74 Resources Management Research Station in Akron, CO, USA y (40.15° N 103.15° W). The soils were selected for their range in total phosphorus,  
75 aluminum and iron concentrations (**Table 3**). The ARDEC soil is of the Nunn soil series (Aridic Argiustolls) and the Akron field site is of the  
76 Weld series (Aridic Paleustolls). The initial soil was analyzed for total elemental concentrations of Ca, Mg, Na, K, Ortho-P, total P, Fe, Mn, S and

77 Cl after nitric and perchloric acid extractions using Inductively Coupled Plasma Atomic Emission Spectroscopy (ICP-AES) [13] and carbon and  
78 nitrogen concentrations were determined using a total organic carbon (TOC) and total nitrogen (TN) analyzer (Shimadzu Corp., Kyoto, Japan). To  
79 estimate the total soil metal (Fe and Al) concentrations as it is related to P-binding capacity we used the binding capacity for Al<sub>2</sub>O<sub>3</sub> and Fe<sub>2</sub>O<sub>3</sub> as  
80 found in Arias, Da Silva-Carballal (14) to normalize Al concentrations to a Fe<sub>equivalent</sub> with regards to P-binding capacity. In short, the average QFe  
81 and QAl from the Freundlich equation were used to generate a conversion factor for Al (0.18/0.32 = 0.56).

82 The slurries were well mixed and 450 µL was pipetted into deep-well (2 mL) 96 well plates. The different microbial cultures (**Table 1**)  
83 were added to wells with soil slurry (n=4) and allowed to incubate while gently shaking at 25°C for 8 days. Initial and final available  
84 orthophosphate concentrations were determined using 0.5M NaHCO<sub>3</sub> extractions [15].

85

## 86 Plant Trials

87 We used the model plant *Arabidopsis thaliana* whose growth is known to be affected by soil inoculations [16]. *Arabidopsis thaliana* wild  
88 type seeds (Edvotek Inc., Washington DC, USA) were planted in four-inch pots with autoclaved soil (50% agricultural soil from the ARDEC  
89 (40.39° N 105.00° W) and 50% potting soil (Miracle-Gro® Potting Mix). The soil autoclaving step (which was confirmed effective in removing  
90 all native bacteria) was added to allow for the determination of synergistic effects independent of native soil communities. Immediately after  
91 planting the seeds, 5 mL of the different cultures outlined in **Table 1** were added to each of the tray slots which resulted in previously determined  
92 saturation of the root zone. Plant were allowed to germinate for 3-5 days under a mist bench after which they were inoculated a second time with 5  
93 mL and kept moist by daily watering. After two weeks, the plants were moved out of the mist bench and were watered daily in a greenhouse set at  
94 22 ± 2.5°C with a day length of 16 hours. To assess plant growth, we manually measured the number of rosette leaves, the maximum rosette

95 diameter and plant height twice weekly according to Boyes, Zayed (17). Soil available P was determined according to Olsen (18). Plants unable to  
96 bolt (emerge) in 32 days which were equally distributed among treatments, were excluded from the analysis.

97

## 98 Statistics

99 The differences among treatments in process rates were tested using an analysis of variance approach (ANOVA) and Tukey pairwise comparisons.  
100 The relationship between the number of bacterial species and quantified processes was conducted using Spearman's correlations. All data was  
101 checked for normality and, if needed, log or square root transformed to acquire normal distribution. Synergistic or antagonistic effects were  
102 determined by subtracting the summed isolate activity from the combination activity and dividing by the summed isolate activity, thus, providing a  
103 percentage of the relative non-additive effect. This represents a conservative estimate of non-additive effects since it does not account for  
104 reductions in bacterial species-specific abundance when in a consortium. P-mobilization sensitivity was defined as the increase in P-mobilization  
105 with the number of bacterial species and abiotic P-mobilization indicates the rate in sterile soils as indicated by the intercept of that relationship.  
106 Treatment effect on plant growth metrics were also assessed using repeated measures ANOVA analyses in combination with contrast analyses to  
107 determine differences among treatments. All statistics were conducted using JMP 11.

108

## 109 Results

### 110 Microbial synergy in culture

111 We found individual bacterial species incubated on low-orthophosphate selective media mobilized P at significantly slower rates than the full  
112 consortium (**Figure 1; Table S1**), indicating strong synergistic effects (**Table 4**). The most successful individual species was *C. testosteroni*  
113 followed by *C. freundii*, both of which were significantly greater than *E. cloacae* but not than *P. putida*. The simpler consortia with similar

114 mobilization rates to the full consortia (*PCo*, *PE*, *PCiE*, *PCi* and *CiE*) were not significantly different from the full consortia but also not from any  
115 other treatments except for the control and the *E* and *P* single strain inoculation. P-mobilization rates within consortia of 2-3 bacterial species were  
116 up to 4-fold greater than those of individual bacterial species.

117

### 118 Microbial synergy in soil

119 We tested the potential for microbial P-solubilization in soils across an estimated gradient of phosphate saturation of the Fe and Al oxides  
120 ( $\text{Fe}_{\text{equivalent}}:\text{PO}_4$ ). The mobilization of P in soils varied with both inoculum composition and soil characteristics (**Figure 2; Table S2**). In the soil  
121 with high a  $\text{Fe}_{\text{equivalent}}:\text{PO}_4$ , we found the full consortia, *PE*, *PCo*, *PE* and *PCiCo* to result in greater P-mobilization rates than the control. In  
122 contrast, the soil with low  $\text{Fe}_{\text{equivalent}}:\text{PO}_4$  showed all treatments except for *P*, *Ci* and *CiCo* to result in significantly lower P-mobilization rates. In  
123 the soil of medium  $\text{Fe}_{\text{equivalent}}:\text{PO}_4$  no inoculation type resulted in greater P-mobilization than in the control. *PCiCo* and *ECiCo* were even  
124 significantly lower in their soil mobilization rate than the control. We found that resource availability, as indicated by the ratio between total P and  
125 the total P-binding capacity of Al and Fe ( $\text{Fe}_{\text{equivalent}}$ ), influenced whether consortium members acted synergistically or antagonistically (**Table 4**).  
126 In soils with a greater concentration of potentially bound P (narrow ratio of  $\text{Fe}_{\text{equivalent}}$  to P ratio), the four microbes exhibited an antagonistic  
127 relationship, while soils with a wider ratio showed a synergistic response (**Figure 2; Table S2**). Soil P-mobilization sensitivity, defined by the rate  
128 at which a greater number of bacterial species increases P-mobilization, was positively correlated to the total  $\text{Fe}_{\text{equivalent}}:\text{P}$  (**Table 3**;  $r^2 = 0.99$ ,  $P <$   
129  $0.05$ ).

130



## 131 Plant Growth and Development

132 We found that plant development varied widely among inoculum treatments. A repeated measures analysis (29-35 days;  $p = 0.12$ ) on plant height  
133 suggested that the full four species consortia treated plant treatment was greater than the control treatment ( $p < 0.05$ ). We could not detect specific  
134 treatment effects for any of the treatments in the maximum rosette diameter or the number of rosette leaves using repeated measures analysis. We  
135 found that increasing the number of bacterial species in the consortium from one to four species increased plant height by up to 32% (**Figure 3**).  
136 Further, inocula containing 1-3 bacterial species were greater in height than the control. Residual available P in the soil after plant harvest was  
137 greatest in the zero-bacterial species control ( $44 \pm 2 \text{ mg kg}^{-1}$ ) and *CiE* ( $46 \pm 4 \text{ mg kg}^{-1}$ ) treatment and lowest in the *C* ( $25 \pm 5 \text{ mg kg}^{-1}$ ) and four  
138 species consortia ( $28 \pm 4 \text{ mg kg}^{-1}$ ) treatments. Inoculation with all four bacterial species reduced the available P by 36% in comparison with the  
139 non-inoculated treatment.

140

## 141 Discussion

142 Across scales—from microplates, soil incubations, and potted plants – we observed a trend of increasing P solubilization and associated benefits  
143 with increasing number of taxa within the consortia. Although, in soil, the magnitude and direction of synergistic effects depended on the relative  
144 amount of  $\text{PO}_4$  compared to Fe and Al concentrations. At each scale, the performance of the full consortium exceeded that of the best performing  
145 individual isolate.  
146 Synergistic microbial interactions have been observed in ecological [6, 19], biofilm [20-22] and bioengineering studies [20, 23-25]. However, net  
147 positive interactions appear rare while competition is prevalent [26, 27]. The majority of positive effects are likely carried out by a very small  
148 proportion of the microbial community that are strongly metabolically linked. Thus, a small consortium selected for a specific trait may represent a

149 small subset of positive interactions in the overall microbial community. The individual species in the consortium tested in this study rarely  
150 exhibited positive effects of the tested trait relative to the control (i.e. P-solubilization, P-mobilization or plant growth). However, the relationships  
151 in culture clearly showed that with increasing consortia complexity, the cultures shifted from P-immobilization to P-solubilization.  
152 In synergistic consortia, individual constituents can enhance overall performance through interactive rather than direct effects. Previous research  
153 has identified *Comamonas spp.* to be important for P-solubilization [28], yet, the *Comamonas testosteroni* in our study proved important for  
154 consortium performance in culture but showed no P-solubilization when inoculated as a single strain. We found the communities with two species  
155 to be very inconsistent in P-solubilization rates while communities of 3-4 species consistently solubilized P in culture. These results contradict a  
156 theoretical model predicting that synergistic interactions should emerge in consortia greater than three bacterial species [29], but it is not  
157 uncommon for synergistic effects to occur within simple ecosystems akin to our laboratory conditions [20, 23-25]. Overall, these findings suggest  
158 that although variance was substantial, consortia are often superior to individual strains of the studied four bacteria and have emergent properties  
159 with regards to P-solubilization in culture.

160  
161 The effects of different constructed consortia on P-mobilization were inconsistent across different soils. *Pseudomonas putida* consistently mobilize  
162 P independent of soil type, while the direction and magnitude of the synergistic response to increasing consortia size depended on soil type.  
163 Surprisingly, even though one of our source soils was alkaline (dominated by calcium oxides), the ratio between  $Fe_{\text{equivalent}}$  to P appeared to control  
164 the sensitivity of P-mobilization, not the combination of Ca, Fe and Al as might be expected since these three elements are part of the dominant  
165 three oxides in soil responsible for P-immobilization [30]. This suggests that solubilization of phosphate sorbed to Fe and Al oxides are the main  
166 mechanisms used by the selected bacteria to increase available phosphorus. The patterns of antagonistic and synergistic effects follow the

167 principles of stoichiometric theory where microbes mobilize P when bound-P is high (low  $Fe_{equivalent}:P$ ) but immobilize P at low availability (high  
168  $Fe_{equivalent}:P$ ) [31]. Indeed, we found antagonistic effects under a low  $Fe_{equivalent}:P$  ratio and high synergistic effects under a high  $Fe_{equivalent}:P$  ratio.  
169 This suggests that the effects observed in culture only translate to the soil environment in soils high in occluded phosphate.  
170 In contrast to the results of the soil incubations, when plants were grown in a mixture containing autoclaved soil from the site high in total P  
171 concentrations we observed strong synergistic effects with inoculation of increasing consortium size. As would be expected, it is highly unlikely  
172 the control treatment remained sterile throughout the experiment but it prevented native microbial interaction from immediately outcompeting the  
173 inoculum species. Although, these results do not guarantee these synergistic relationships will also manifest with inoculations in more complicated  
174 ecosystems, previous research on the same consortium has found positive effects on plant growth when inoculated in native soil [10]. Microbial P-  
175 solubilization has been linked with plant performance in many previous studies summarized by Richardson and Simpson (32) and, similarly, our  
176 greenhouse experiment showed that the soils of plants inoculated with larger consortia (which had greater P-solubilization in culture) resulted in  
177 increased P-mining. Why did we not observe this effect in the soil incubation? Perhaps plant root exudation shifted the soil stoichiometry to a  
178 degree that the inoculated bacteria initiate P-mining [33] which was not present in the soil only incubations. Alternatively, the observed growth  
179 enhancement could be the results of wide range of plant-microbial dynamics related to for example indoleacetic acid (IAA), siderophore activities  
180 and ACC deaminase [34]. Unlike in the culture and soil experiments, the greenhouse experiment showed strong alignment with the theoretical  
181 model by Guo and Boedicker (29) suggesting that a more complex ecosystem including plants is more sensitive to emergent properties from  
182 bacteria-bacteria interactions. Inconsistent effects of single-bacterial species microbial inoculants might be explained by the lack of breadth in  
183 functional traits [35, 36]. Further, the reduced variance for larger consortia indicates that consortia size controlled not only the enhancement in  
184 growth, but enabled plants to more consistently approach their genetic growth potential.

185

186 This series of experiments demonstrates that microbial functional traits can emerge within bacterial consortia that are not apparent at the individual  
187 taxa level – *i.e.* the whole is more than the sum of its parts. Our study shows that screening individual bacterial species may not yield the same  
188 effects when compared to a microbial consortium. Microbial consortia can have superior function compared to individual bacterial species and  
189 these synergies may transcend ecosystem scales. Future studies need to be focus on determining the prevalence of these mechanisms in more  
190 complicated ecosystems. This work has important implications for efforts to harness the soil microbiome to enhance food production and  
191 agroecosystem sustainability.

192

193

194 **References:**

- 195 1. Wallenstein MD. Managing and manipulating the rhizosphere microbiome for plant health: a systems approach. *Rhizosphere*.  
196 2017;3:230-2.
- 197 2. Kaminsky LM, Trexler RV, Malik RJ, Hockett KL, Bell TH. The inherent conflicts in developing soil microbial inoculants. *Trends in*  
198 *biotechnology*. 2019;37(2):140-51.
- 199 3. Martiny JB, Jones SE, Lennon JT, Martiny AC. Microbiomes in light of traits: a phylogenetic perspective. *Science*.  
200 2015;350(6261):aac9323.
- 201 4. Moat AG, Foster JW, Spector MP. *Microbial physiology*: John Wiley & Sons; 2003.
- 202 5. Tabassum B, Khan A, Tariq M, Ramzan M, Khan MSI, Shahid N, et al. Bottlenecks in commercialisation and future prospects of PGPR.  
203 *Applied Soil Ecology*. 2017;121:102-17.
- 204 6. Cordovez V, Dini-Andreote F, Carrión VJ, Raaijmakers JM. Ecology and evolution of plant microbiomes. *Annual review of microbiology*.  
205 2019;73.
- 206 7. Herrera Paredes S, Gao T, Law TF, Finkel OM, Mucyn T, Teixeira PJPL, et al. Design of synthetic bacterial communities for predictable  
207 plant phenotypes. *PLOS Biology*. 2018;16(2):e2003962. doi: 10.1371/journal.pbio.2003962.
- 208 8. Malusà E, Pinzari F, Canfora L. Efficacy of biofertilizers: challenges to improve crop production. *Microbial inoculants in sustainable*  
209 *agricultural productivity*: Springer; 2016. p. 17-40.
- 210 9. Wallenstein MD, Bell CW. Synergistic bacterial consortia for mobilizing soil phosphorus. Google Patents; 2018.
- 211 10. Baas P, Bell C, Mancini L, Lee M, Conant RT, Wallenstein MD. Phosphorus mobilizing consortium Mammoth P enhances plant growth.  
212 *PeerJ*. 2016;4:e2121.
- 213 11. Conant R, Walsh R, Walsh M, Bell C, Wallenstein M. Effects of a Microbial Biostimulant, Mammoth PTM, on Cannabis sativa Bud Yield. *J*  
214 *Hortic*. 2017;4(191):2376-0354.1000191.
- 215 12. Murphy J, Riley J. A modified single solution method for the determination of phosphate in natural waters. *Analytica chimica acta*.  
216 1962;27:31-6.
- 217 13. USEPA Method 3050B. "Method 3050B Acid digestion of sediments, sludges and soils", Revision 2, Environmental Protection Agency,  
218 Washington, USA 3-5. 1996.
- 219 14. Arias M, Da Silva-Carballal J, Garcia-Rio L, Mejuto J, Nunez A. Retention of phosphorus by iron and aluminum-oxides-coated quartz  
220 particles. *Journal of colloid and interface science*. 2006;295(1):65-70.
- 221 15. Watanabe F, Olsen S. Test of an ascorbic acid method for determining phosphorus in water and NaHCO<sub>3</sub> extracts from soil. *Soil Science*  
222 *Society of America Journal*. 1965;29(6):677-8.
- 223 16. Swenson W, Wilson DS, Elias R. Artificial ecosystem selection. *Proceedings of the National Academy of Sciences of the United States of*  
224 *America*. 2000;97(16):9110-4. PubMed PMID: PMC16830.
- 225 17. Boyes DC, Zayed AM, Ascenzi R, McCaskill AJ, Hoffman NE, Davis KR, et al. Growth stage-based phenotypic analysis of Arabidopsis a  
226 model for high throughput functional genomics in plants. *The Plant Cell*. 2001;13(7):1499-510.

- 227 18. Olsen SR. Estimation of available phosphorus in soils by extraction with sodium bicarbonate. 1954.
- 228 19. Stubbendieck RM, Vargas-Bautista C, Straight PD. Bacterial communities: interactions to scale. *Frontiers in microbiology*. 2016;7:1234.
- 229 20. Rice SA, Wuertz S, Kjelleberg S. Next-generation studies of microbial biofilm communities. *Microbial biotechnology*. 2016;9(5):677-80.
- 230 21. Flemming H-C, Wingender J, Szewzyk U, Steinberg P, Rice SA, Kjelleberg S. Biofilms: an emergent form of bacterial life. *Nature Reviews*
- 231 *Microbiology*. 2016;14(9):563.
- 232 22. Martin M, Hölscher T, Dragoš A, Cooper VS, Kovács ÁT. Laboratory evolution of microbial interactions in bacterial biofilms. *Journal of*
- 233 *bacteriology*. 2016;198(19):2564-71.
- 234 23. Wang VB, Yam JKH, Chua S-L, Zhang Q, Cao B, Chye JLS, et al. Synergistic microbial consortium for bioenergy generation from complex
- 235 natural energy sources. *The Scientific World Journal*. 2014;2014.
- 236 24. Zhang H, Wang X. Modular co-culture engineering, a new approach for metabolic engineering. *Metabolic engineering*. 2016;37:114-21.
- 237 25. Venturelli OS, Egbert RG, Arkin AP. Towards engineering biological systems in a broader context. *Journal of molecular biology*.
- 238 2016;428(5):928-44.
- 239 26. Freilich S, Zarecki R, Eilam O, Segal ES, Henry CS, Kupiec M, et al. Competitive and cooperative metabolic interactions in bacterial
- 240 communities. *Nature communications*. 2011;2:589.
- 241 27. Foster KR, Bell T. Competition, not cooperation, dominates interactions among culturable microbial species. *Current biology*.
- 242 2012;22(19):1845-50.
- 243 28. Rani A, Souche Y, Goel R. Comparative in situ remediation potential of *Pseudomonas putida* 710A and *Comamonas aquatica* 710B
- 244 using plant (*Vigna radiata* (L.) wilczek) assay. *Annals of Microbiology*. 2013;63(3):923-8.
- 245 29. Guo X, Boedicker JQ. The contribution of high-order metabolic interactions to the global activity of a four-species microbial community.
- 246 *PLoS computational biology*. 2016;12(9):e1005079.
- 247 30. Sims JT, Pierzynski GM. Chemistry of phosphorus in soils. *SOIL SCIENCE SOCIETY OF AMERICA BOOK SERIES*. 2005;8:151.
- 248 31. Hall E, Maixner F, Franklin O, Daims H, Richter A, Battin T. Linking microbial and ecosystem ecology using ecological stoichiometry: a
- 249 synthesis of conceptual and empirical approaches. *Ecosystems*. 2011;14(2):261-73.
- 250 32. Richardson AE, Simpson RJ. Soil microorganisms mediating phosphorus availability update on microbial phosphorus. *Plant physiology*.
- 251 2011;156(3):989-96.
- 252 33. Drake JE, Darby B, Giasson M-A, Kramer MA, Phillips RP, Finzi AC. Stoichiometry constrains microbial response to root exudation-insights
- 253 from a model and a field experiment in a temperate forest. *Biogeosciences*. 2013;10(2):821-38.
- 254 34. Zolla G, Bakker MG, Badri DV, Chaparro JM, Sheflin AM, Manter DK, et al. Understanding Root–Microbiome Interactions. *Molecular*
- 255 *Microbial Ecology of the Rhizosphere*: John Wiley & Sons, Inc.; 2013. p. 743-54.
- 256 35. Thurston MA. Identification of phosphate solubilizing bacteria and evaluation of their application with insoluble phosphorus fertilizers to
- 257 soils from certified organic orchards affected by replant disease. 2013.
- 258 36. Fanin N, Fromin N, Bertrand I. Functional breadth and home-field advantage generate functional differences among soil microbial
- 259 decomposers. *Ecology*. 2016.
- 260

261

## 262 **Acknowledgements**

263 The authors acknowledge the support of the U.S. Department of Agriculture (USDA) (#2015-67030-22990), Colorado State University  
264 (#14BGF19A), the National Science Foundation Directorate for Biological Sciences (DEB-1020540) and Colorado Office of Economic  
265 Development and Intl Trade (#19KO BSGR ECFCP7122).

266

## 267 **Supporting information**

268 *Table S1*: P-mobilization rates in culture (nM/h)

269 *Table S2*: P-mobilization rates in soil ( $\mu\text{M}/\text{d}$ )

270

271

272

273

274 **Table 1:** Relative proportions of culture volume for the different treatments for the culture and soil experiment. All treatments were conducted for  
275 the culture and soil inoculation experiment while a subset of treatments was selected for inoculation in the plant experiment (\*)  
276

| <b>Treatment</b> | <b>Proportion (%)</b> |                    |                  |                        |
|------------------|-----------------------|--------------------|------------------|------------------------|
|                  | <i>E. cloacae</i>     | <i>C. freundii</i> | <i>P. putida</i> | <i>C. testosteroni</i> |
| PCiCoE*          | 30                    | 20                 | 40               | 10                     |
| PCiE*            | 33                    | 22                 | 44               | 0                      |
| PCiCo*           | 0                     | 29                 | 57               | 14                     |
| PCoE*            | 38                    | 0                  | 50               | 12                     |
| ECiCo*           | 50                    | 33                 | 0                | 17                     |
| PCi*             | 0                     | 33                 | 67               | 0                      |
| PCiCo            | 0                     | 40                 | 40               | 20                     |
| PCoE*            | 43                    | 0                  | 57               | 0                      |
| PCo*             | 0                     | 0                  | 80               | 20                     |
| CiE*             | 60                    | 40                 | 0                | 0                      |
| CiCo*            | 0                     | 67                 | 0                | 33                     |
| CoE*             | 75                    | 0                  | 0                | 25                     |
| P*               | 0                     | 0                  | 100              | 0                      |
| Ci*              | 0                     | 100                | 0                | 0                      |
| E*               | 100                   | 0                  | 0                | 0                      |
| Co*              | 0                     | 0                  | 0                | 100                    |



278 **Table 2:** The relative proportions (%) of the top four bacterial species representing >95% of all  
 279 operationally defined units (out; n=5) in the Mammoth P™ mixture as indicated in Baas, Bell (10).

| <b>Family</b>             | <b>Genus/Species</b>          | <b>Abundance (%)</b> |
|---------------------------|-------------------------------|----------------------|
| <i>Enterobacteriaceae</i> | <i>Citrobacter freundii</i>   | 35 ± 4               |
| <i>Enterobacteriaceae</i> | <i>Enterobacter cloacae</i>   | 17 ± 2               |
| <i>Pseudomonadaceae</i>   | <i>Pseudomonas putida</i>     | 38 ± 6               |
| <i>Comamonadaceae</i>     | <i>Comamonas testosteroni</i> | 6 ± 2                |
| -----Total-----           |                               | 96 ± 1               |

280 bioRxiv preprint doi: <https://doi.org/10.1101/2020.11.12.379529>; this version posted November 12, 2020. The copyright holder for this preprint (which was not certified by peer review) is the author/funder, who has granted bioRxiv a license to display the preprint in perpetuity. It is made available under a [CC-BY 4.0 International license](https://creativecommons.org/licenses/by/4.0/).  
 281  
 282

283 **Table 3:** Soil properties. The numbers indicate the means and associated standard error for the pH. The remaining elements were analyzed on a  
284 single composited sample (n=1). Different letters indicate significantly different means ( $p < 0.05$ ). The elemental concentrations indicate total soil  
285 content.

| <b>Soil Type</b> | <b>Location</b>  | <b>pH</b>          | <b>P (mg kg<sub>soil</sub><sup>-1</sup>)</b> | <b>Fe (g kg<sub>soil</sub><sup>-1</sup>)</b> | <b>Al (g kg<sub>soil</sub><sup>-1</sup>)</b> | <b>Ca (g kg<sub>soil</sub><sup>-1</sup>)</b> | <b>Zn (mg kg<sub>soil</sub><sup>-1</sup>)</b> | <b>Mg (g kg<sub>soil</sub><sup>-1</sup>)</b> |
|------------------|------------------|--------------------|----------------------------------------------|----------------------------------------------|----------------------------------------------|----------------------------------------------|-----------------------------------------------|----------------------------------------------|
| Corn Dryland     | Akron, CO        | 5.9 ± 0.1 <b>c</b> | 199                                          | 10.3                                         | 14.4                                         | 1.7                                          | 25.0                                          | 3.3                                          |
| Corn Irrigated   | Akron, CO        | 6.8 ± 0.1 <b>b</b> | 287                                          | 16.1                                         | 33.2                                         | 3.7                                          | 54.2                                          | 7.4                                          |
| Wheat Irrigated  | Fort Collins, CO | 8.6 ± 0.0 <b>a</b> | 444                                          | 14.3                                         | 26.1                                         | 21.0                                         | 44.7                                          | 7.8                                          |

286  
287  
288  
289

290 **Table 4:** Synergistic effects for a selection of the tested consortia compositions for P-mobilization in culture and three different soils. C =  
 291 *Citrobacter freundii*; E = *Enterobacter cloacae*; P = *Pseudomonas putida*; Co = *Comamonas testosteroni*. For each treatment n=4. Irrig. =  
 292 irrigated. The error represents the standard error of the mean and different letters indicate significant differences among treatments.

| Treatment     | Synergistic Effect (%) |                     |                     |                    |
|---------------|------------------------|---------------------|---------------------|--------------------|
|               | Culture                | Soil – Corn dryland | Soil – Wheat Irrig. | Soil – Corn Irrig. |
| <b>PCiCoE</b> | 188 ± 21 <b>bcd</b>    | -39 ± 17            | -66 ± 8 <b>b</b>    | 156 ± 52 <b>ab</b> |
| <b>PCiE</b>   | 267 ± 19 <b>b</b>      | -21 ± 46            | -38 ± 8 <b>b</b>    | 85 ± 8 <b>ab</b>   |
| <b>PE</b>     | 462 ± 27 <b>a</b>      | -72 ± 14            | -95 ± 4 <b>b</b>    | 59 ± 14 <b>ab</b>  |
| <b>PCo</b>    | 224 ± 23 <b>bc</b>     | 0 ± 54              | -96 ± 5 <b>b</b>    | -2 ± 32 <b>b</b>   |
| <b>PCi</b>    | 141 ± 2 <b>cd</b>      | -69 ± 10            | -83 ± 14 <b>b</b>   | 44 ± 16 <b>ab</b>  |
| <b>CiE</b>    | 118 ± 31 <b>de</b>     | -9 ± 8              | -75 ± 9 <b>b</b>    | 239 ± 19 <b>a</b>  |
| <b>CoE</b>    | -1 ± 10 <b>f</b>       | 94 ± 62             | 143 ± 60 <b>a</b>   | 172 ± 62 <b>ab</b> |
| <b>CiCo</b>   | 8 ± 15 <b>ef</b>       | 69 ± 24             | -69 ± 19 <b>b</b>   | 270 ± 106 <b>a</b> |

293  
 294  
 295  
 296  
 297  
 298  
 299  
 300  
 301  
 302  
 303  
 304  
 305  
 306  
 307  
 308  
 309  
 310  
 311  
 312  
 313  
 314  
 315

316 **Figure Legends:**

317

318 Figure 1: Culture P-mobilization in P-limiting media. The regression on the bottom was significant with  $p < 0.001$ . The points and bars represent  
319 the mean and the error bars indicate the standard error of the mean. Different letters indicate significant differences. The color and pattern indicate  
320 the presence of different combinations of species. For each treatment  $n=4$ . Purple/hatched vertically = *C. testosteroni*; Blue/hatched 30° = *E.*  
321 *cloacae*; Green/hatched 330° = *C. freundii*; Red/solid = *P. putida*.

322

323 Figure 2: Soil P-mobilization from ARDEC (a), dryland Akron (b) and irrigated Akron (c) soil with different microbial inoculation treatments. The  
324 regressions on the bottom for ARDEC (d), dryland Akron (e) and irrigated Akron (f) were significant with  $p < 0.01$ . The Fe:P ratio indicates the  
325 total Fe-equivalent concentration (including Fe and Al) to total P. The greater the ratio the greater the amount of phosphorus is being bound by Fe  
326 and Al oxides. For each treatment  $n=4$ . Purple/hatched vertically = *C. testosteroni*; Blue/hatched 30° = *E. cloacae*; Green/hatched 330° = *C.*  
327 *freundii*; Red/solid = *P. putida*. The points and bars represent the mean and the error bars indicate the standard error of the mean. Different letters  
328 indicate significant differences.

329

330 Figure 3: Arabidopsis growth metrics with different numbers of bacterial species (*P. putida*, *E. cloacae*, *C. freundii* and *C. testosteroni*) added.  
331 The points represent the mean and the error bars indicate the standard error of the mean. For every treatment  $n=12$ .

bioRxiv preprint doi: <https://doi.org/10.1101/2020.11.12.379529>; this version posted November 12, 2020. The copyright holder for this preprint (which was not certified by peer review) is the author/funder, who has granted bioRxiv a license to display the preprint in perpetuity. It is made available under a [CC-BY 4.0 International license](#).

Fe:P

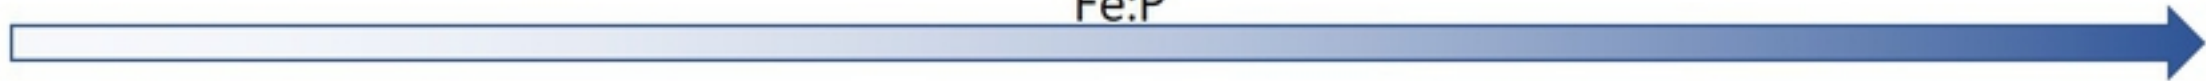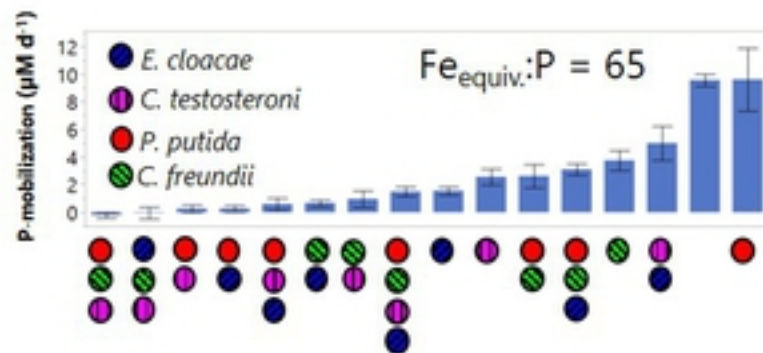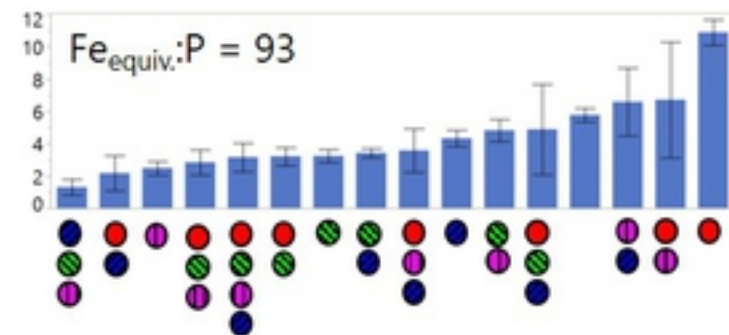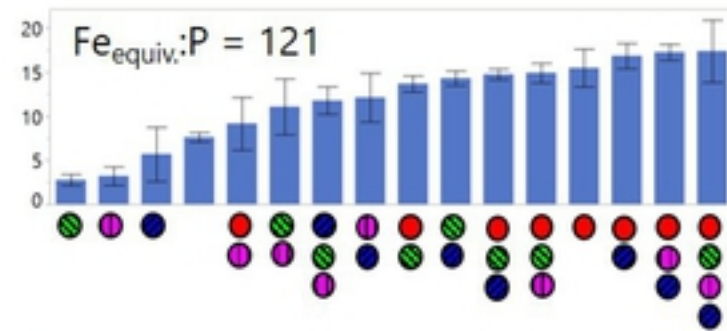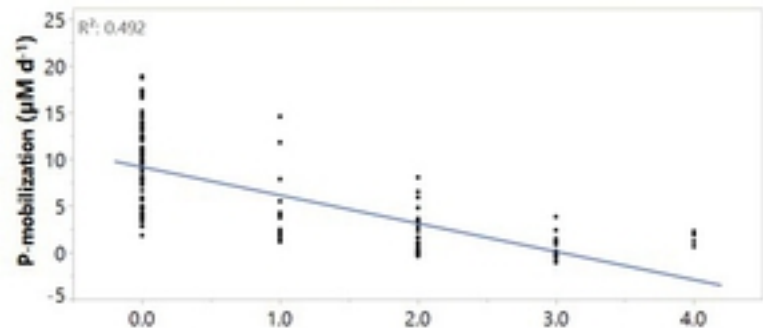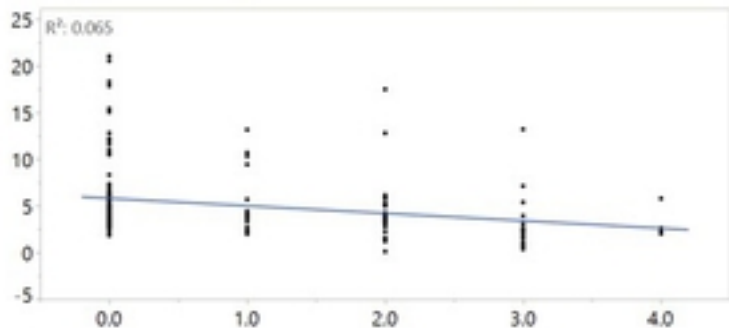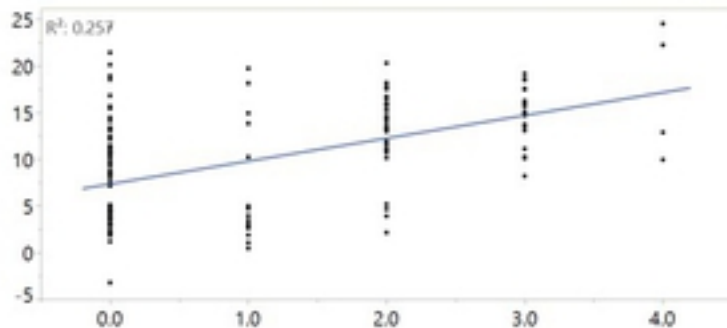

bioRxiv preprint doi: <https://doi.org/10.1101/2020.11.12.379529>; this version posted November 12, 2020. The copyright holder for this preprint (which was not certified by peer review) is the author/funder, who has granted bioRxiv a license to display the preprint in perpetuity. It is made available under a [CC-BY 4.0 International license](https://creativecommons.org/licenses/by/4.0/).

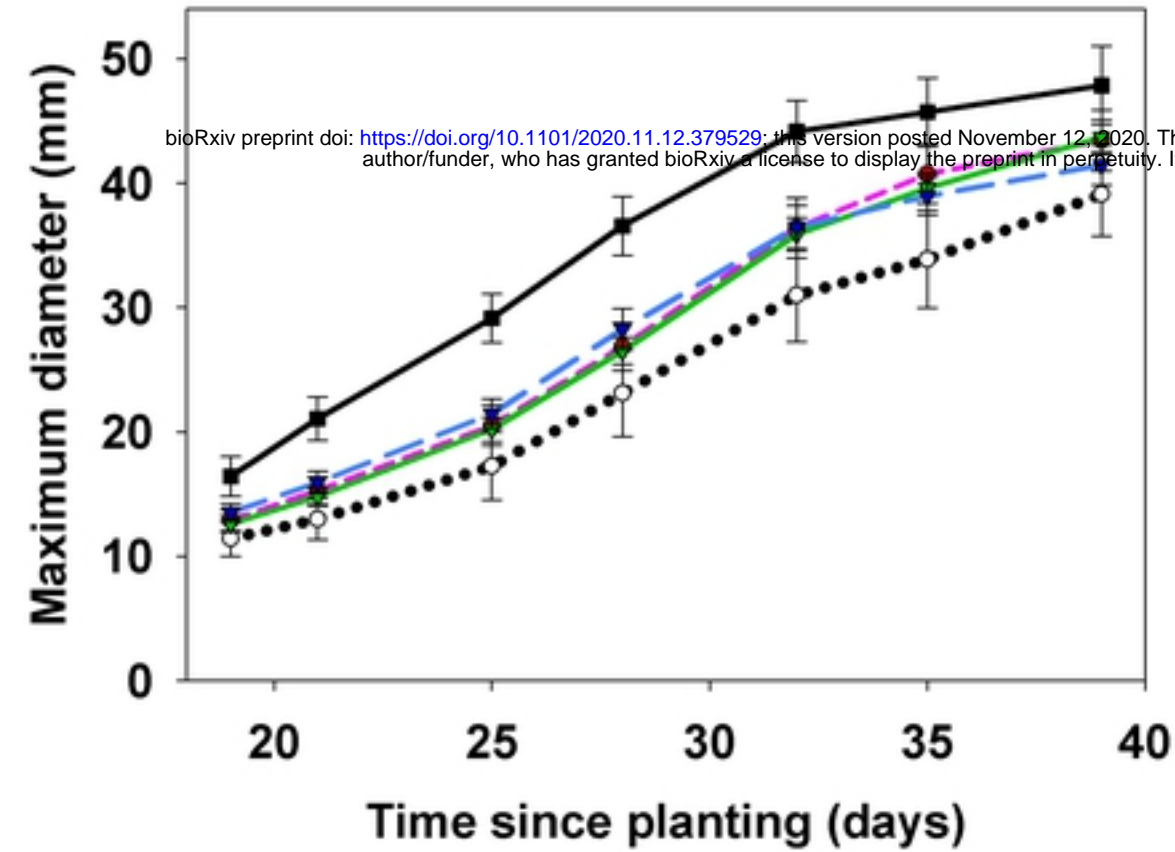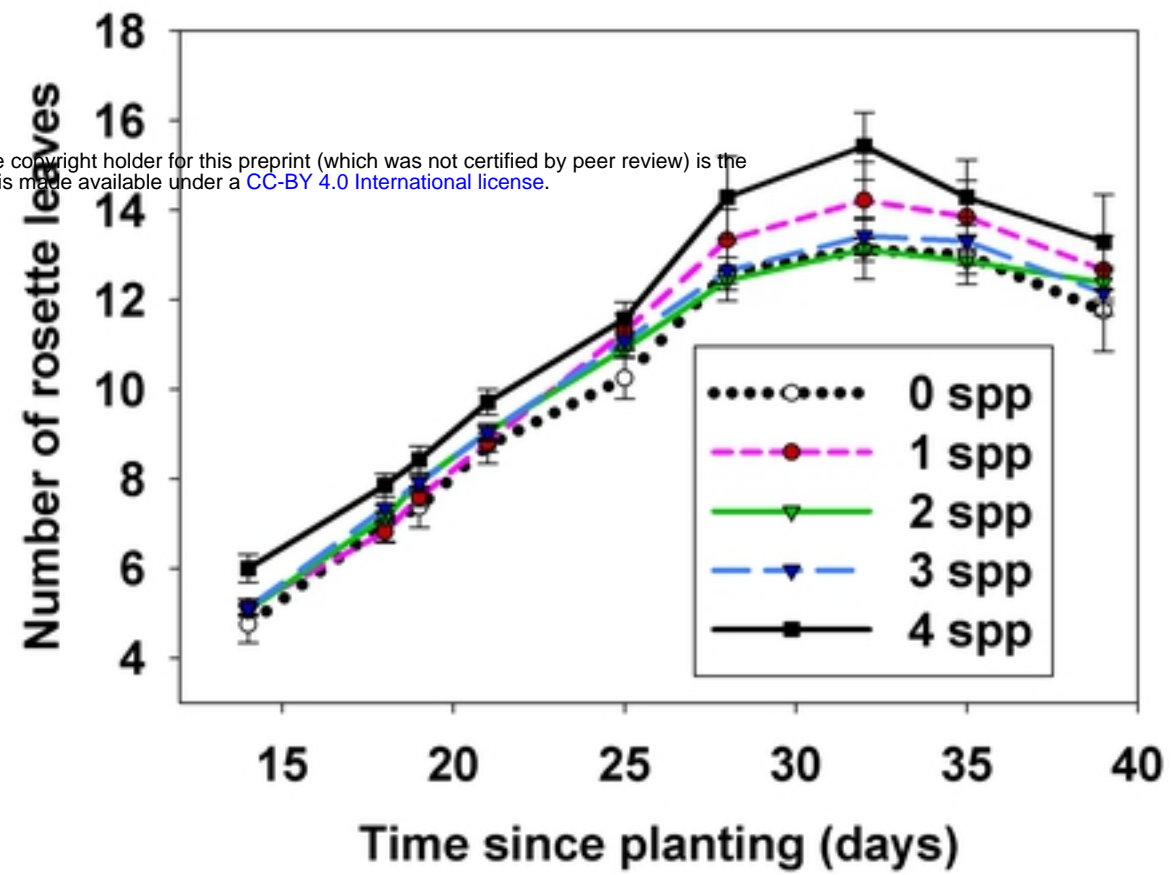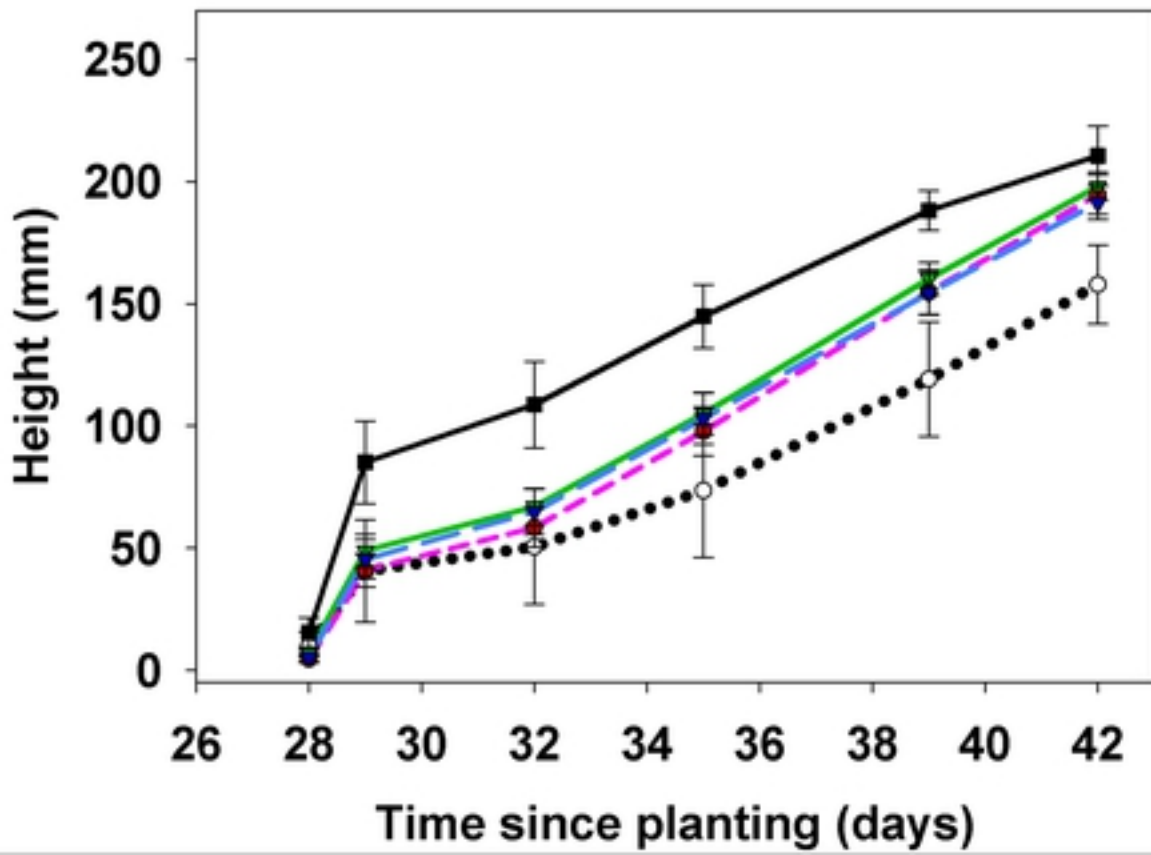

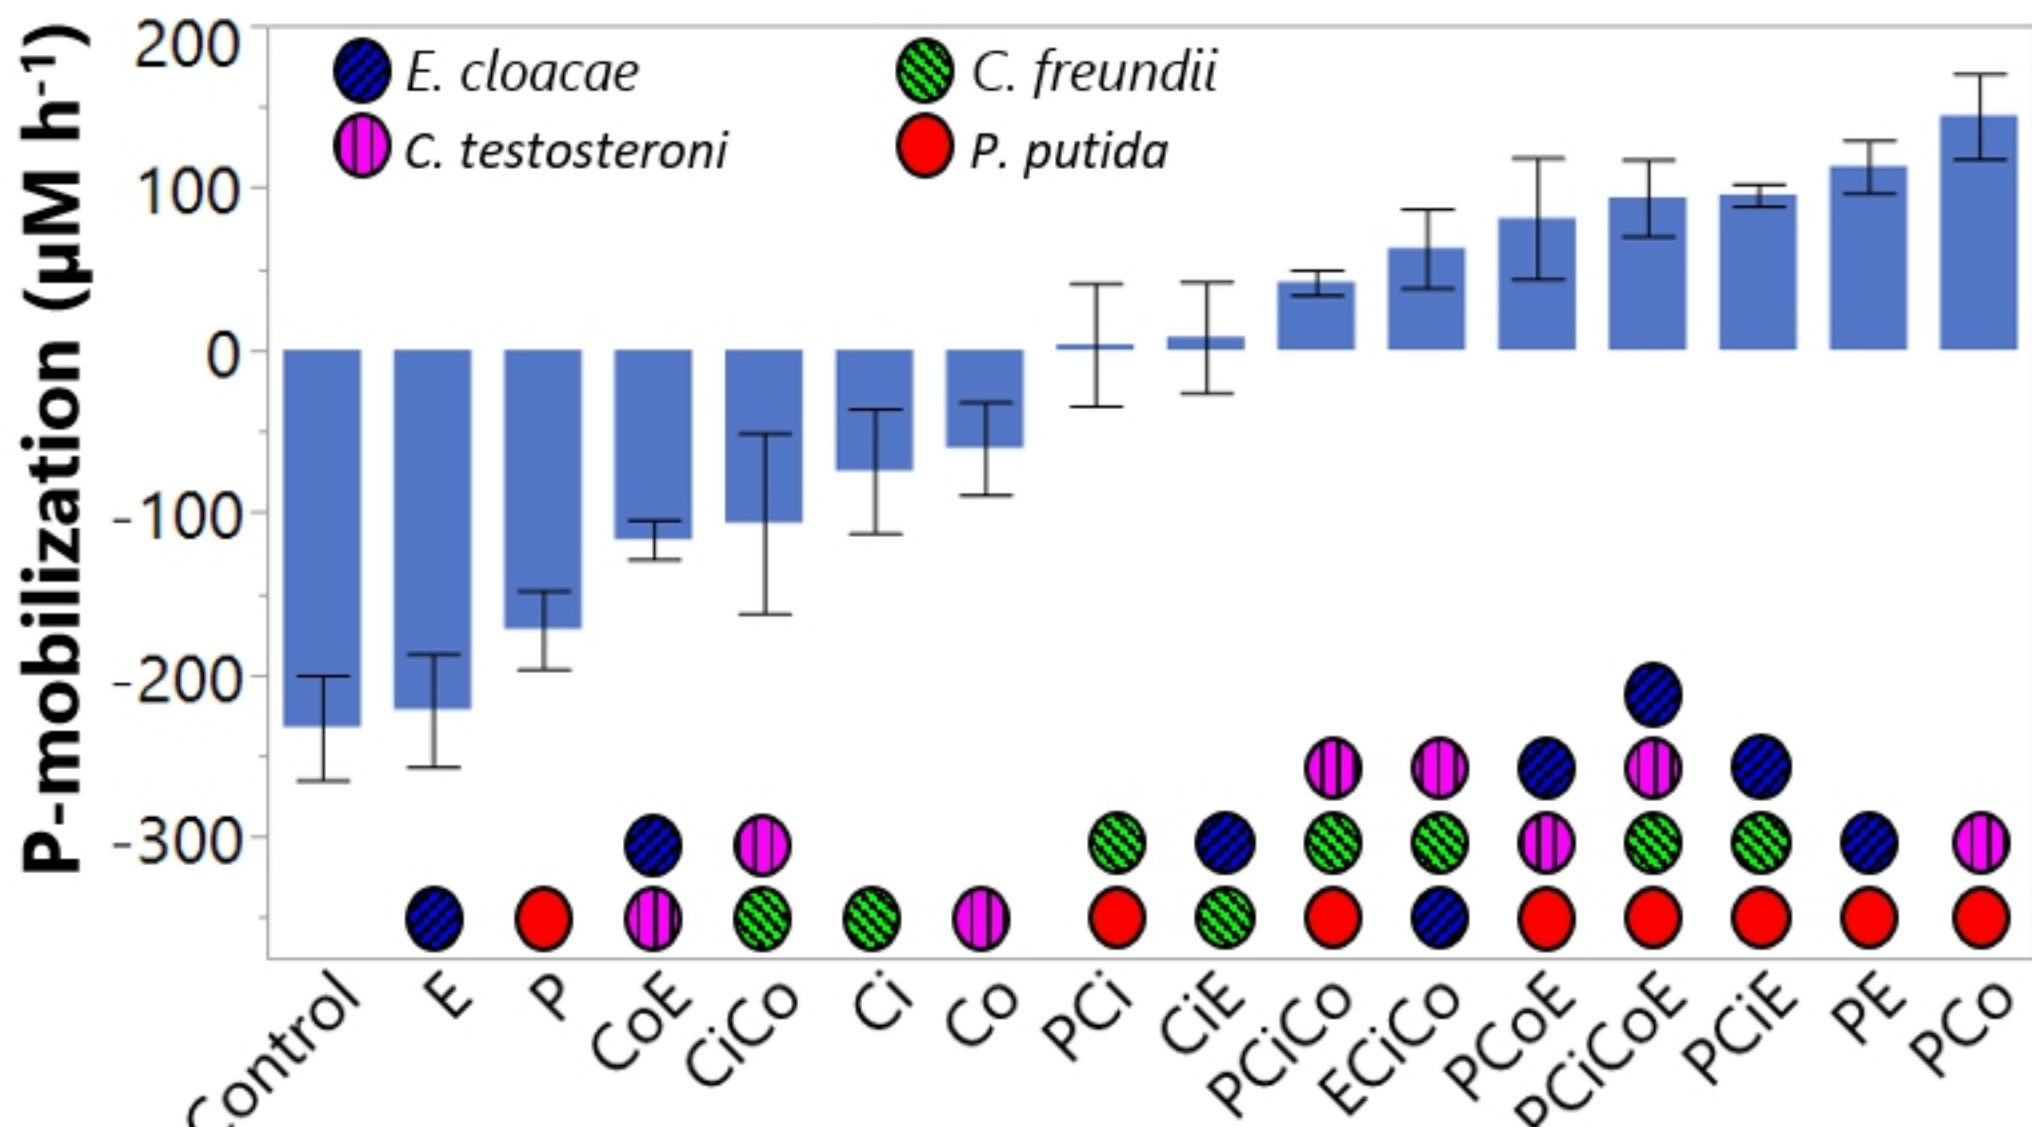

bioRxiv preprint doi: <https://doi.org/10.1101/2020.11.12.379529>; this version posted November 12, 2020. The copyright holder for this preprint (which was not certified by peer review) is the author/funder, who has granted bioRxiv a license to display the preprint in perpetuity. It is made available under a [CC-BY 4.0 International license](https://creativecommons.org/licenses/by/4.0/).

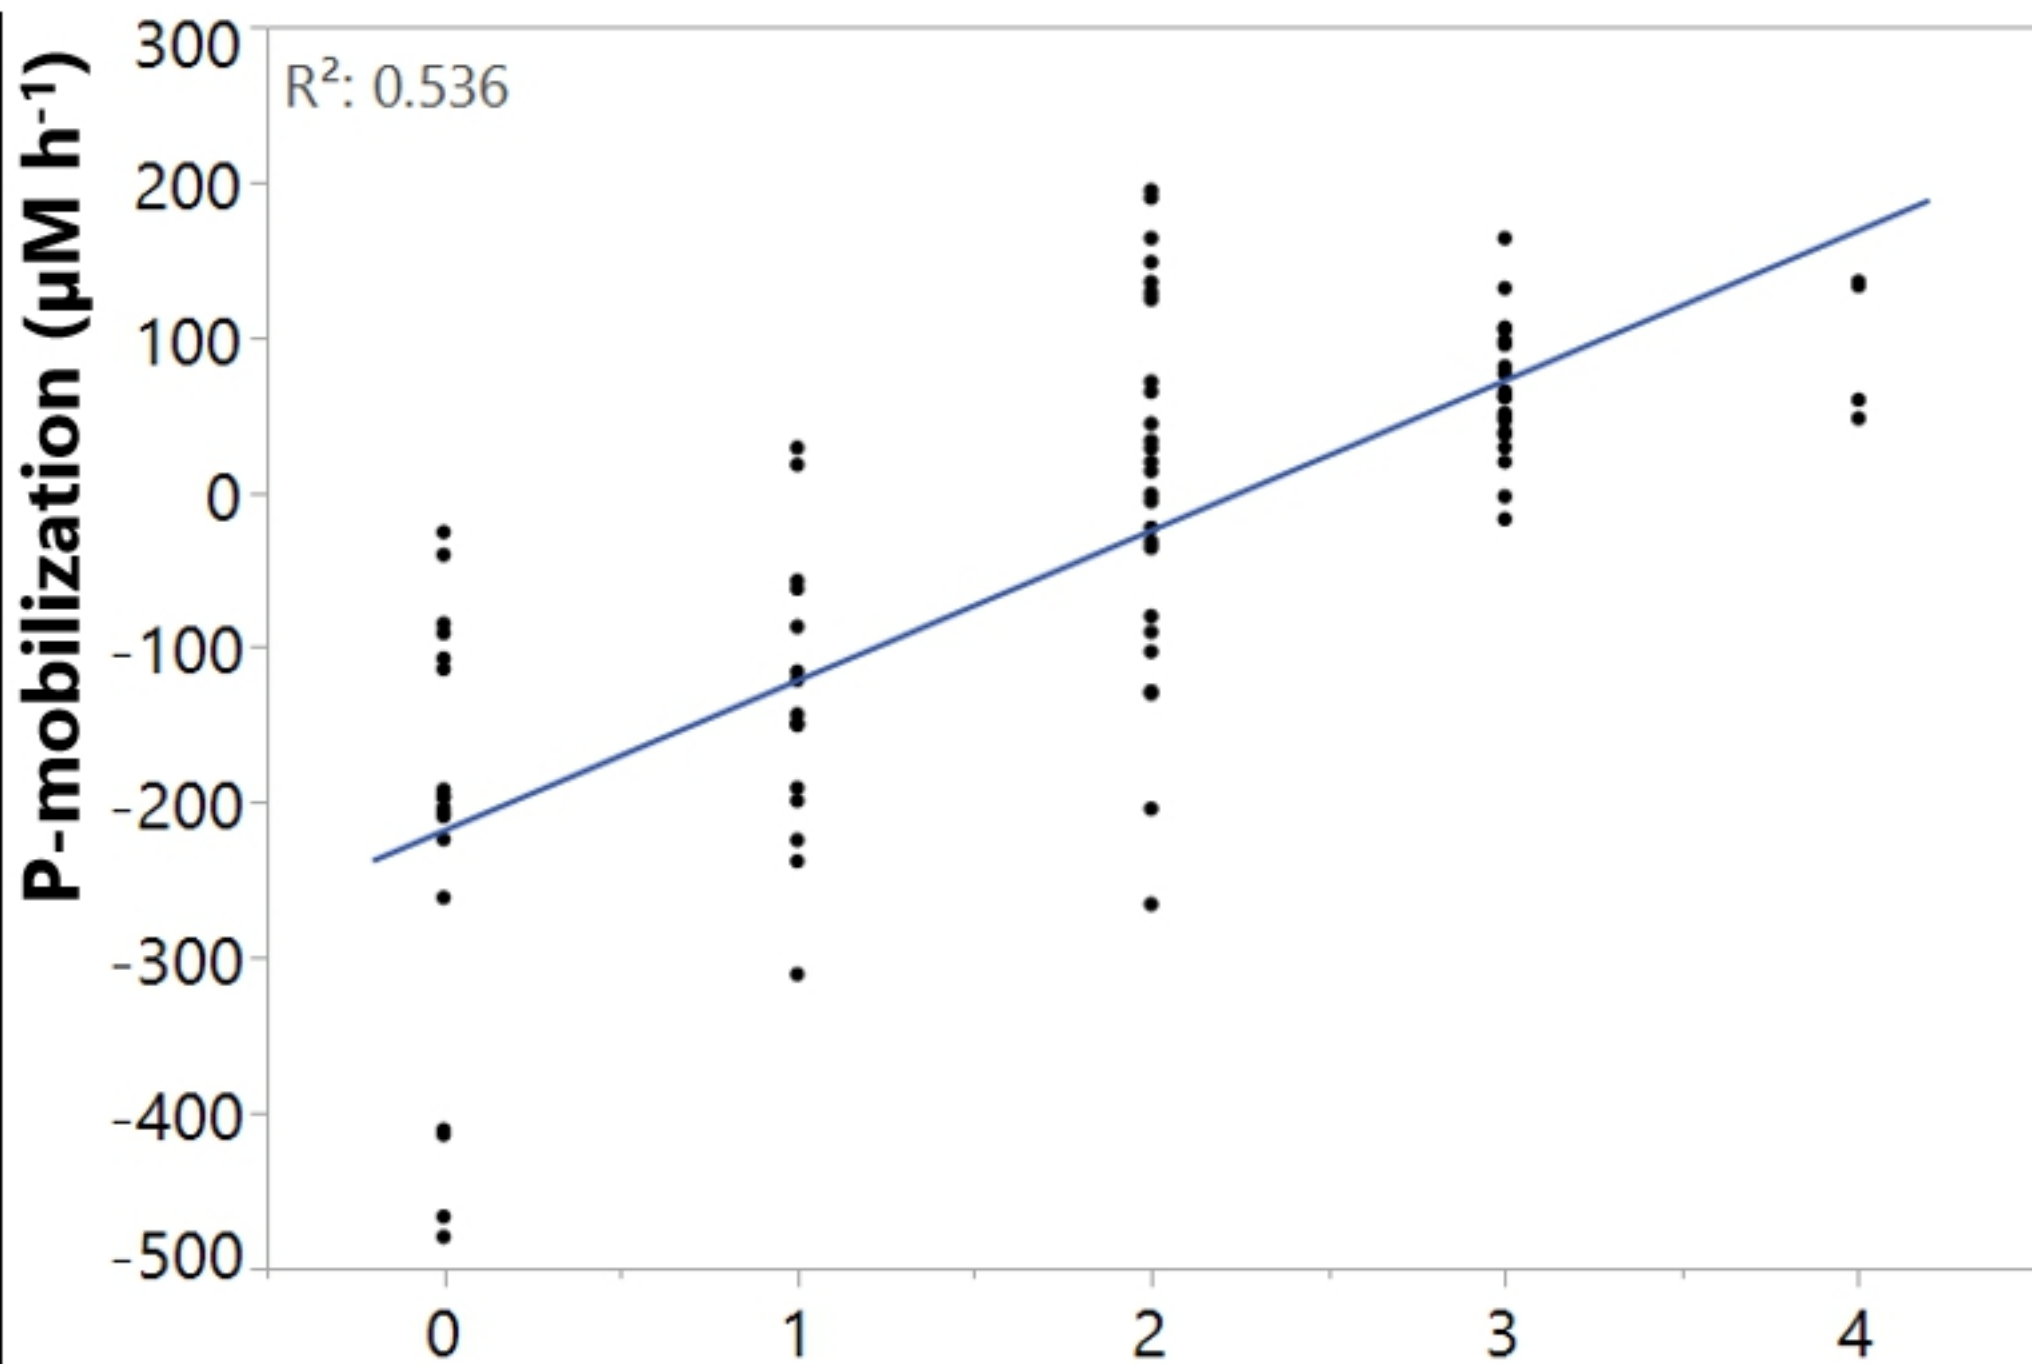

Source: https://www.biorxiv.org/content/10.1101/2020.11.12.379529v1.full.pdf
